# Supplementary material for: Exercise in pregnancy: 1-year and 7-year follow-ups of mothers and offspring after a randomized controlled trial
Source: PubMed Central journal article supplement (PMC6110723; doi:10.1038/s41598-018-30925-5), 2018-08-27
Supplement: 41598_2018_30925_MOESM1_ESM.pdf [file 41598_2018_30925_MOESM1_ESM.pdf]

# **Exercise in pregnancy: 1-year and 7-year follow-ups of mothers and offspring after a randomized controlled trial**

## **Supplementary Tables**

Valentina Chiavaroli<sup>1\*</sup>, Sarah A Hopkins<sup>1\*</sup>, José G B Derraik<sup>1,2,3</sup>, Janene B Biggs<sup>1</sup>, Raquel O Rodrigues<sup>1</sup>, Christine H Brennan<sup>1</sup>, Sumudu N Seneviratne<sup>1,4</sup>, Chelsea Higgins<sup>1</sup>, James C Baldi<sup>5</sup>, Lesley M E McCowan<sup>6</sup>, Wayne S Cutfield<sup>1,2</sup>, Paul L Hofman<sup>1†</sup>

<sup>1</sup> Liggins Institute, University of Auckland, Auckland, New Zealand;

<sup>2</sup> A Better Start – National Science Challenge, University of Auckland, Auckland, New Zealand;

<sup>3</sup> Department of Women's and Children's Health, Uppsala University, Uppsala, Sweden.

<sup>4</sup> Department of Paediatrics, Faculty of Medicine, University of Colombo, Sri Lanka;

<sup>5</sup> Department of Medicine, Dunedin School of Medicine, University of Otago, Dunedin, New Zealand;

<sup>6</sup> Department of Obstetrics and Gynaecology, Faculty of Medical and Health Sciences, University of Auckland, Auckland, New Zealand.

\* These authors contributed equally to this work.

## Supplementary Table 1

Dietary intake and physical activity levels at 7-year follow-up among mothers with completed questionnaires who either exercised in pregnancy or were controls. Data are means  $\pm$  standard deviations.

|                          |                                             | <b>Control</b>  | <b>Exercise</b> | <b>p-value</b> |
|--------------------------|---------------------------------------------|-----------------|-----------------|----------------|
| <b>Dietary intake</b>    | n (proportion of group assessed)            | 18 (75%)        | 23 (70%)        |                |
|                          | Energy (kJ)                                 | 7255 $\pm$ 2472 | 7114 $\pm$ 1849 | 0.84           |
|                          | Fat (g)                                     | 66 $\pm$ 26     | 70 $\pm$ 21     | 0.59           |
|                          | Sugar (g)                                   | 74 $\pm$ 33     | 81 $\pm$ 29     | 0.46           |
|                          | Dietary fibre (g)                           | 22 $\pm$ 11     | 23 $\pm$ 10     | 0.83           |
|                          | Total energy from fat (%)                   | 33 $\pm$ 6      | 35 $\pm$ 7      | 0.32           |
|                          | Total energy from protein (%)               | 21 $\pm$ 7      | 19 $\pm$ 4      | 0.33           |
|                          | Total energy from carbohydrate (%)          | 42 $\pm$ 8      | 43 $\pm$ 9      | 0.76           |
| <b>Physical activity</b> | n (proportion of group assessed)            | 13 (54%)        | 22 (67%)        |                |
|                          | Metabolic equivalent of task (MET)          | 1.66 $\pm$ 0.47 | 1.61 $\pm$ 0.44 | 0.76           |
|                          | Moderate to high intensity exercise (% MET) | 13 $\pm$ 11     | 12 $\pm$ 6      | 0.76           |

## Supplementary Table 2

Dietary intake at 7-year follow-up among children with completed questionnaires and who were born to mothers who exercised in pregnancy or to controls. Age data are means  $\pm$  standard deviations; other data are means and 95% confidence intervals adjusted for sex and age.

|                       |                                    | <b>Control</b>   | <b>Exercise</b>  | <b>p-value</b> |
|-----------------------|------------------------------------|------------------|------------------|----------------|
| <b>n</b>              |                                    | 18               | 23               |                |
| <b>Demography</b>     | Age (years)                        | 7.7 $\pm$ 0.7    | 7.5 $\pm$ 0.9    | 0.54           |
|                       | Sex ratio (males)                  | 39%              | 78%              | <b>0.022</b>   |
|                       | Ethnicity (European)               | 94%              | 78%              | 0.21           |
| <b>Dietary intake</b> | Energy (kJ)                        | 7067 (6399–7736) | 6598 (5950–7246) | 0.12           |
|                       | Fat (g)                            | 57 (51–65)       | 50 (44–57)       | 0.14           |
|                       | Sugar (g)                          | 89 (72–105)      | 88 (72–103)      | 0.93           |
|                       | Dietary fibre (g)                  | 22 (18–25)       | 20 (16–23)       | 0.47           |
|                       | Total energy from fat (%)          | 31 (27–34)       | 28 (25–32)       | 0.35           |
|                       | Total energy from protein (%)      | 15 (14–17)       | 18 (16–20)       | 0.06           |
|                       | Total energy from carbohydrate (%) | 52 (48–56)       | 52 (48–56)       | 0.98           |

### Supplementary Table 3

Parameters at 7-year follow-up among boys and girls born to mother who exercised in pregnancy or to control mothers, with evidence of sex-specific effects.

|                                                     |       | Control            | Exercise          | p-value |
|-----------------------------------------------------|-------|--------------------|-------------------|---------|
| <b>n</b>                                            | Boys  | 10                 | 21                | -       |
|                                                     | Girls | 14                 | 12                | -       |
| <b>Height SDS – MPHSDS</b> <sup>1</sup>             | Boys  | 1.06 (0.27–1.86)   | 0.33 (-0.25–0.91) | 0.07    |
|                                                     | Girls | -0.22 (-0.99–0.55) | 0.26 (-0.33–0.85) | 0.32    |
| <b>Diastolic blood pressure (mmHg)</b> <sup>2</sup> | Boys  | 55.9 (47.3–64.5)   | 62.9 (56.8–69.0)  | 0.13    |
|                                                     | Girls | 59.8 (54.2–65.5)   | 56.1 (51.3–60.8)  | 0.28    |

MPHSDS, mid-parental height standard deviation score; SDS, standard deviation score.

<sup>1</sup> Means and 95% confidence intervals adjusted for maternal age and ethnicity, and child's age.

<sup>2</sup> Means and 95% confidence intervals adjusted for maternal age and ethnicity, and child's height.
